# Supplementary material
Source: PubMed Central journal article supplement (PMC3500042)
Supplement: supp_cvs262_cvs262supp.pdf [file supp_cvs262_cvs262supp.pdf]

## Supplementary Material

### Chemokine (C-C motif) receptor 2 mediates mast cell migration to abdominal aortic aneurysm lesions in mice

Jie Zhang<sup>1,\*</sup> Huimei Chen<sup>1,2,\*</sup> Li Liu<sup>1,3</sup>, Jiusong Sun<sup>1</sup>, Michael A. Shi<sup>1</sup>, Galina K. Sukhova<sup>1</sup>, Guo-Ping Shi<sup>1</sup>

<sup>1</sup>Department of Medicine, Brigham and Women's Hospital, Harvard Medical School, Boston, MA 02115, USA; <sup>2</sup>Department of Medical Genetics and Research Institute of Nephrology, Nanjing University School of Medicine, Nanjing, 210093 China; and <sup>3</sup>Department of Biology, School of Life Science, Huzhou Teachers College, Huzhou, 313000, Zhejiang, China.

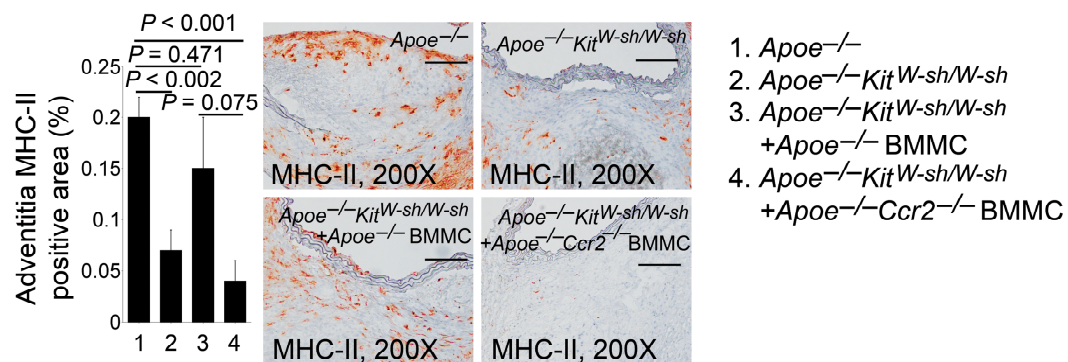

**Supplementary Figure 1.** MHC-II expression in adventitia from AAA lesions from *Apoe*<sup>-/-</sup> mice, *Apoe*<sup>-/-</sup>*Kit*<sup>W-sh/W-sh</sup> mice, and *Apoe*<sup>-/-</sup>*Kit*<sup>W-sh/W-sh</sup> mice receiving BMMC from *Apoe*<sup>-/-</sup> mice or *Apoe*<sup>-/-</sup>*Ccr2*<sup>-/-</sup> mice, n=9~11 per group. Data are mean ± SEM. Representative micrographs are indicated to the right. Scale bar: 100 μm.
